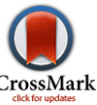

## Correction

# Correction: *APOE* $\epsilon$ 4 Is Associated with Disproportionate Progressive Hippocampal Atrophy in AD

The *PLOS ONE* Staff

## Notice of Republication

This article was republished on July 7, 2014, to correct an error in the byline; the publisher apologizes for the error. In addition, Figures 1-6 were resized. Please download this article again to view the correct version. The originally published, uncorrected article and the republished, corrected article are provided here for reference.

## Supporting Information

**File S1.** Originally published, uncorrected article.  
(PDF)

**File S2.** Republished, corrected article.  
(PDF)

## Reference

1. Manning EN, Barnes J, Cash DM, Bartlett JW, Leung KK, et al. (2014) *APOE*  $\epsilon$ 4 Is Associated with Disproportionate Progressive Hippocampal Atrophy in AD. *PLoS ONE* 9(5): e97608. doi:10.1371/journal.pone.0097608

---

**Citation:** The *PLOS ONE* Staff (2014) Correction: *APOE*  $\epsilon$ 4 Is Associated with Disproportionate Progressive Hippocampal Atrophy in AD. *PLoS ONE* 9(7): e104482. doi:10.1371/journal.pone.0104482

**Published:** July 29, 2014

**Copyright:** © 2014 The *PLOS ONE* Staff. This is an open-access article distributed under the terms of the Creative Commons Attribution License, which permits unrestricted use, distribution, and reproduction in any medium, provided the original author and source are credited.
